# Supplementary material
Source: Springer Nature journal article supplement (https://www.springermedizin.de/resource/supplementary/12970_2013_413_MOESM7_ESM.pdf/9593908)

Figure 9.

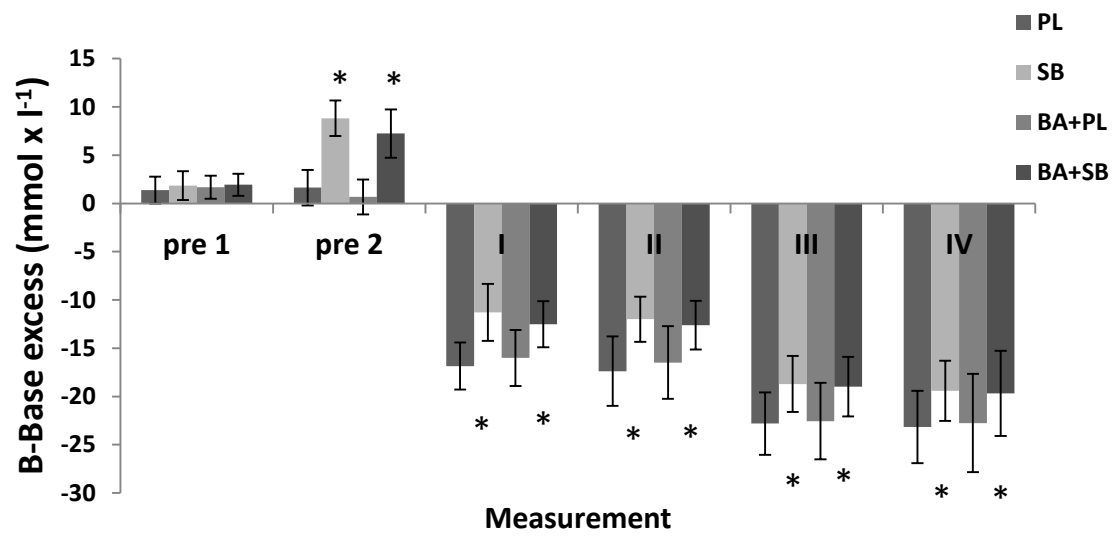

Supplement: MOESM7 [file 9593908]
